# Supplementary material for: Cell-to-cell signalling mediated via CO2: activity dependent axonal CO2 production opens Cx32 in the Schwann cell paranode
Source: bioRxiv preprint, doi:10.1101/2025.04.04.647196, version 2 (2026-04-22)
Supplement: Source data for Fig 11 and supplements [file 647196_file09.xlsx]

## Sheet: Fig11C
70 mmHg	CBX
31.1	1.2
19.2	2.2
15.5	1.1
13.2	7.6
9.8	5.6
7.2
