# Supplementary material for: Cell-to-cell signalling mediated via CO2: activity dependent axonal CO2 production opens Cx32 in the Schwann cell paranode
Source: bioRxiv preprint, doi:10.1101/2025.04.04.647196, version 2 (2026-04-22)
Supplement: Source data for Fig 13 and supplements [file 647196_file11.xlsx]

## Sheet: Fig13E
Control	L-Phe	TC AQP1-1	AZ
0.138	0.082	0.01	0.238
0.036	0.006	0.0002	0.146
0.113	0.007	0.00532412	0.18
0.132	0.0345	0.0332	0.1993
0.0899	0.00993	0.0352435	0.114
